# Supplementary material for: Evolution of the patella and patelloid in marsupial mammals
Source: PeerJ journal article supplement (doi:10.7717/peerj.9760), 2020-08-19
Supplement: Figure_S1-Samuels-parsimony-tree.pdf [file Figure_S1-Samuels-parsimony-tree.pdf]

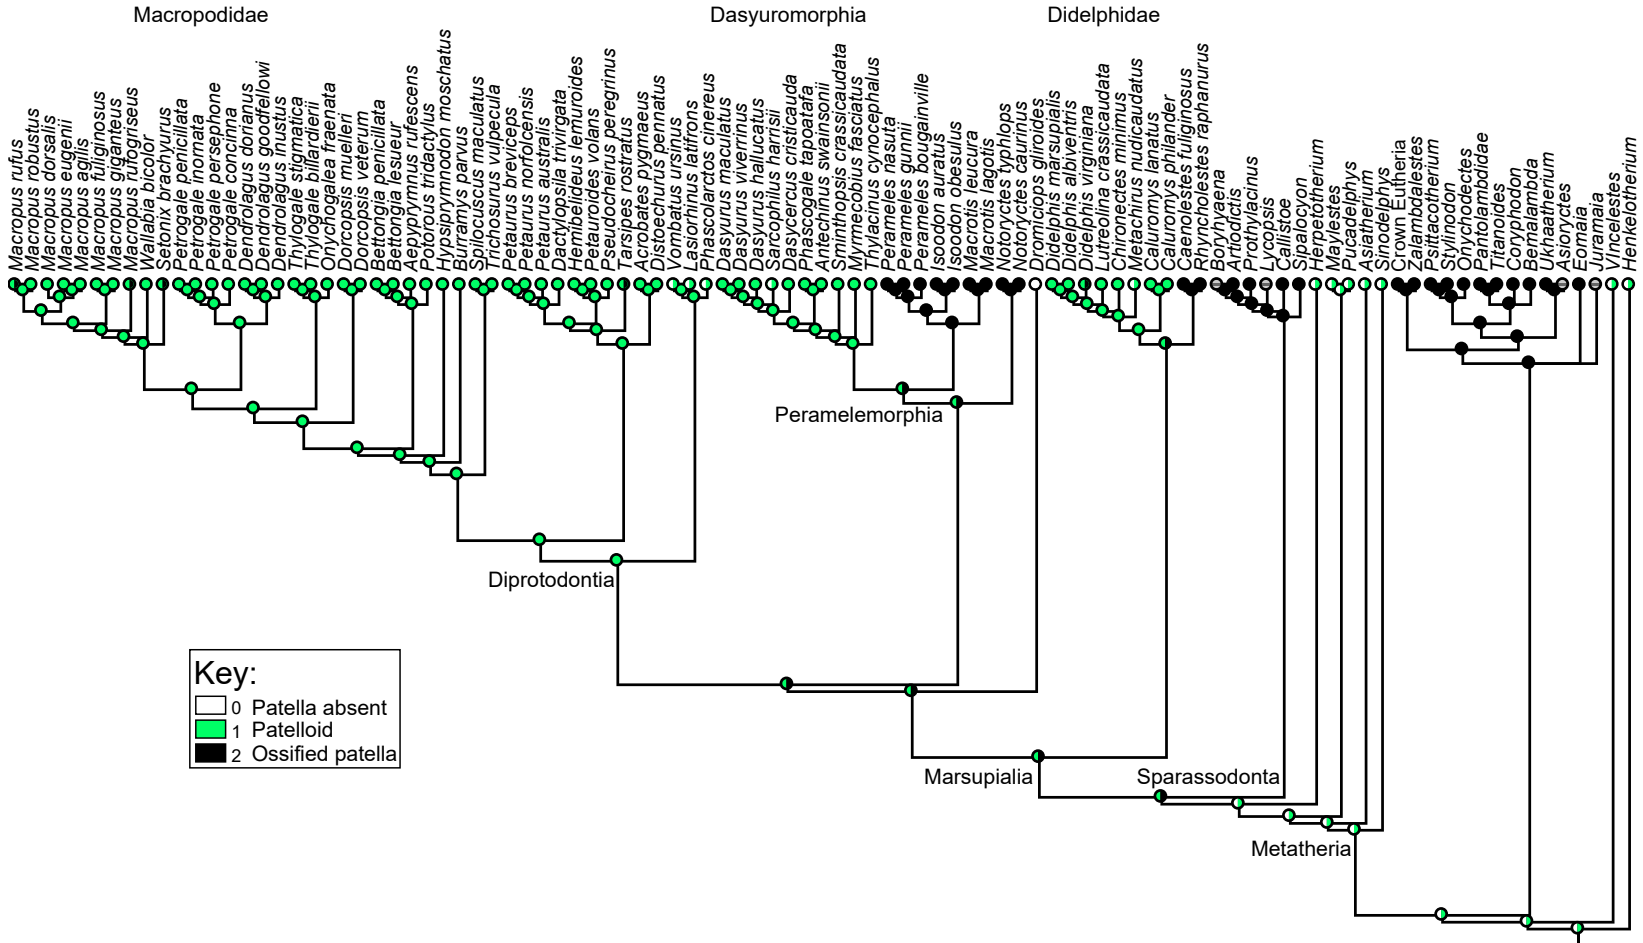

**Key:**  
 0 Patella absent  
 1 Patelloid  
 2 Ossified patella

Macropodidae

Dasyuromorphia

Didelphidae

Diprotodontia

Peramelemorphia

Marsupialia

Sparassodonta

Metatheria

- Macropus rufus
- Macropus robustus
- Macropus dorsalis
- Macropus eugenii
- Macropus agilis
- Macropus fuliginosus
- Macropus giganteus
- Macropus rufogriseus
- Wallabia bicolor
- Setonix brachyurus
- Petrogale penicillata
- Petrogale inornata
- Petrogale persephone
- Petrogale concinna
- Dendrolagus dorianus
- Dendrolagus goodfellowi
- Dendrolagus inustus
- Thylogale stigmatica
- Thylogale billardieri
- Onychogalea traenata
- Dorcopsis muelleri
- Dorcopsis veterum
- Betongia penicillata
- Betongia lesueur
- Aepyrymnus rufescens
- Potorous tridactylus
- Hypsiprymnodon moschatus
- Burrumys parvus
- Spilocuscus maculatus
- Trichosurus vulpecula
- Petaurus breviceps
- Petaurus norfolcensis
- Petaurus australis
- Dactylopsilla trivirgata
- Hemibelideus lemuroides
- Petauroideus volens
- Pseudocheirus peregrinus
- Tarsipes rostratus
- Acrobates pygmaeus
- Distocheirus pennatus
- Vombatulus ursinus
- Lasiorhinus latifrons
- Phascogale cinerea
- Dasyurus maculatus
- Dasyurus viverrinus
- Dasyurus hallucatus
- Sarcophilus harrisi
- Dasyurus cristicauda
- Phascogale tapoatafa
- Antechinus swainsonii
- Sminthopsis crassicaudata
- Myrmecobius fasciatus
- Thylacynus cyniocephalus
- Perameles nasuta
- Perameles gunnii
- Perameles bougainville
- Isodon auratus
- Isodon obesulus
- Macrotis leucura
- Macrotis lagotis
- Notoryctes typhlops
- Notoryctes caurinus
- Dromiciops gliroides
- Didelphis marsupialis
- Didelphis albiventris
- Didelphis virginiana
- Lutreolina crassicaudata
- Chironectes minimus
- Metachirus nudicaudatus
- Caluromys lanatus
- Caluromys phillander
- Caenolestes fuliginosus
- Rhyncholestes raphanurus
- Boryhaena
- Artiodactylus
- Prothylacynus
- Lycopsis
- Callistae
- Sipacoyon
- Hemipotherium
- Maystes
- Pucadelphys
- Asiatarium
- Sinodelphys
- Zrown Eutheria
- Zalambdolestes
- Sitacotherium
- Stylirodon
- Onychodectes
- Parotolambdidae
- Titanoides
- Coryphodon
- Bemalambda
- Ukhaatherium
- Asioryctes
- Eomaia
- Juramaia
- Vincelestes
- Henkelotherium
